# Supplementary material for: Graphene quantum dots: effect of size, composition and curvature on their assembly
Source: Royal Society of Chemistry journal article supplement (doi:10.1039/c7ra01029j), 2017-01-01
Supplement: c7ra01029j1.pdf [file c7ra01029j1.pdf]

## Electronic Supplementary Information

# Graphene quantum dots: effect of size, composition and curvature on their assembly

Paolo Elvati,<sup>a</sup> Elizabeth Baumeister,<sup>b</sup> and Angela Violi<sup>\* a,b,c</sup>

<sup>a</sup> Mechanical Engineering, University of Michigan, Ann Arbor, MI, USA

<sup>b</sup> Chemical Engineering, University of Michigan, Ann Arbor, MI, USA.

<sup>c</sup> Macromolecular Science and Engineering, Biophysics Program, University of Michigan, Ann Arbor, MI, USA.

\* [avioli@umich.edu](mailto:avioli@umich.edu)

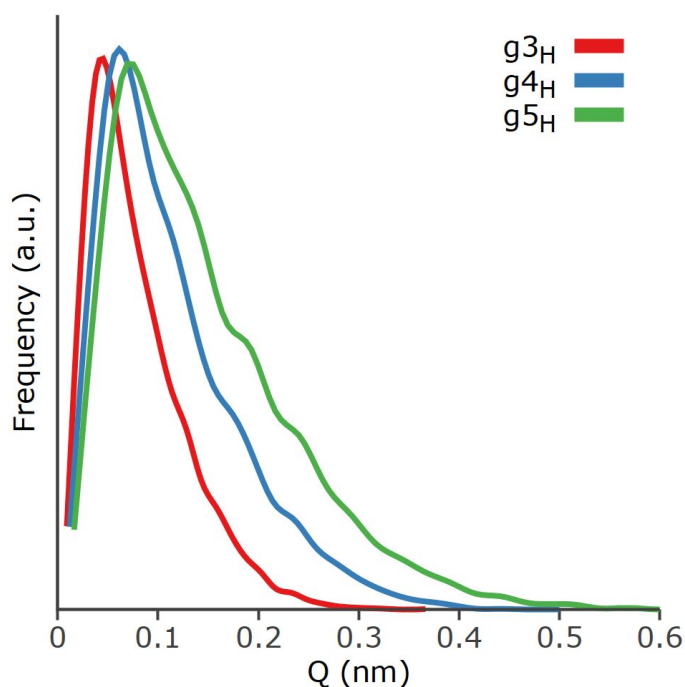

**Figure X1** Measure of the deviation from a planar configuration for hydrogen terminated single GQDs of different sizes.

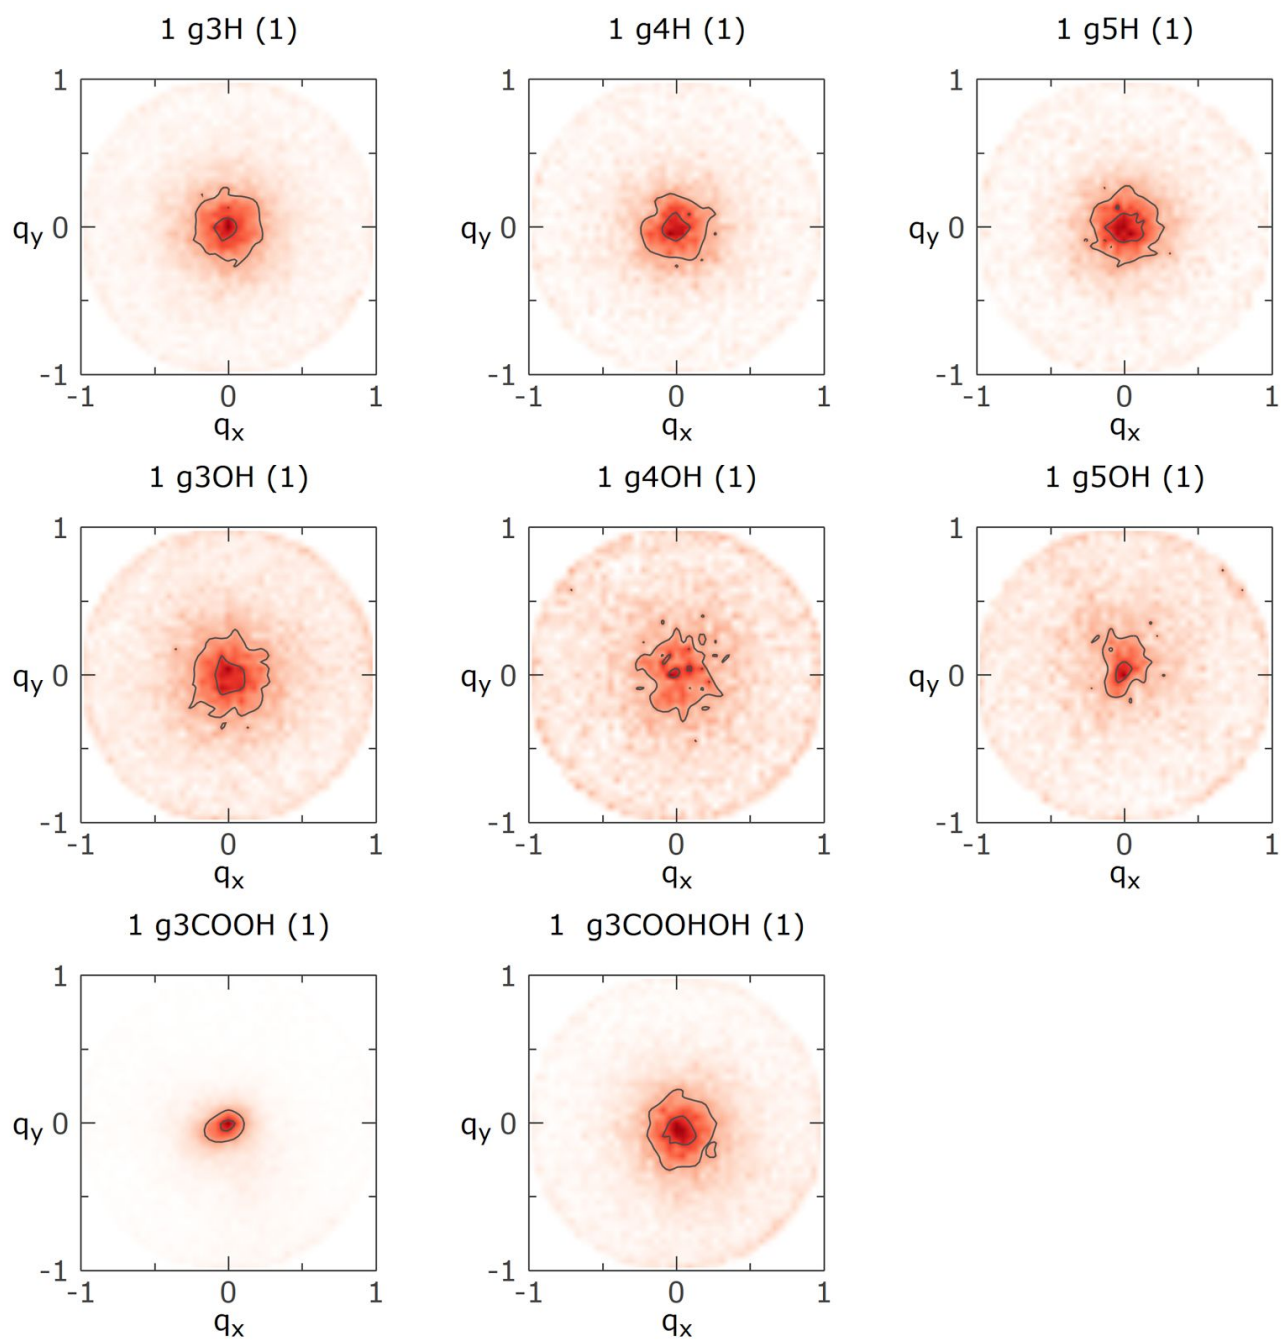

**Figure X2** Distribution of conformations of single GQDs in water.

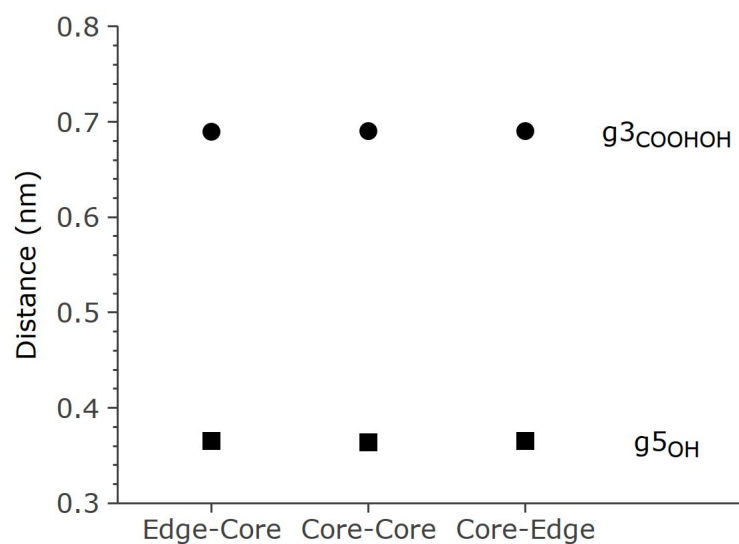

**Figure X3** Dependency of the interlayer distances on the relative position of the molecules inside a 4 GQDs stack. Both stacks are composed entirely by the same type of structures CS for the g5OH and WS for the g3COOH.OH. Errorbars are smaller than the symbols.

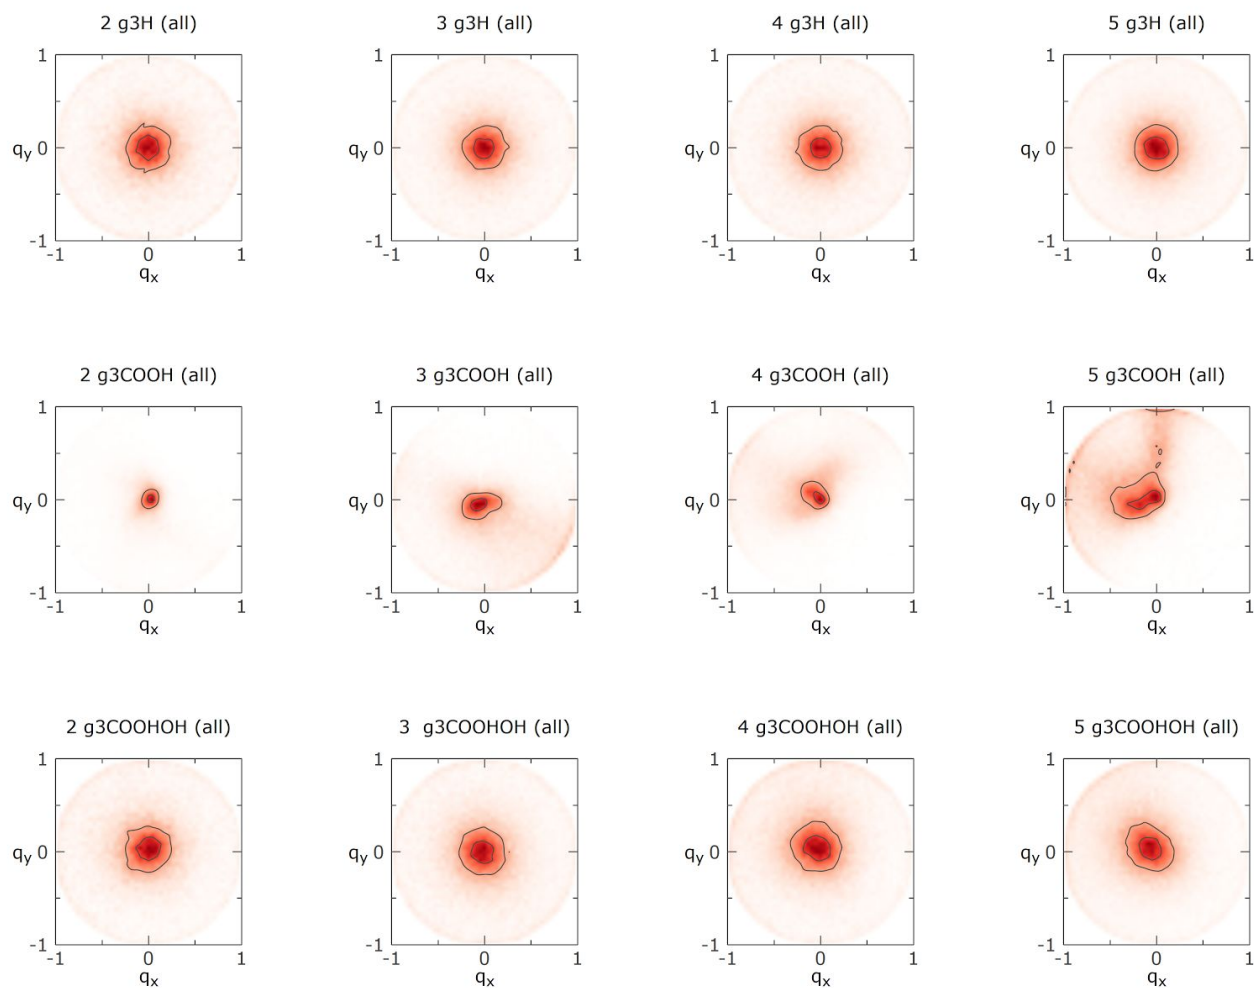

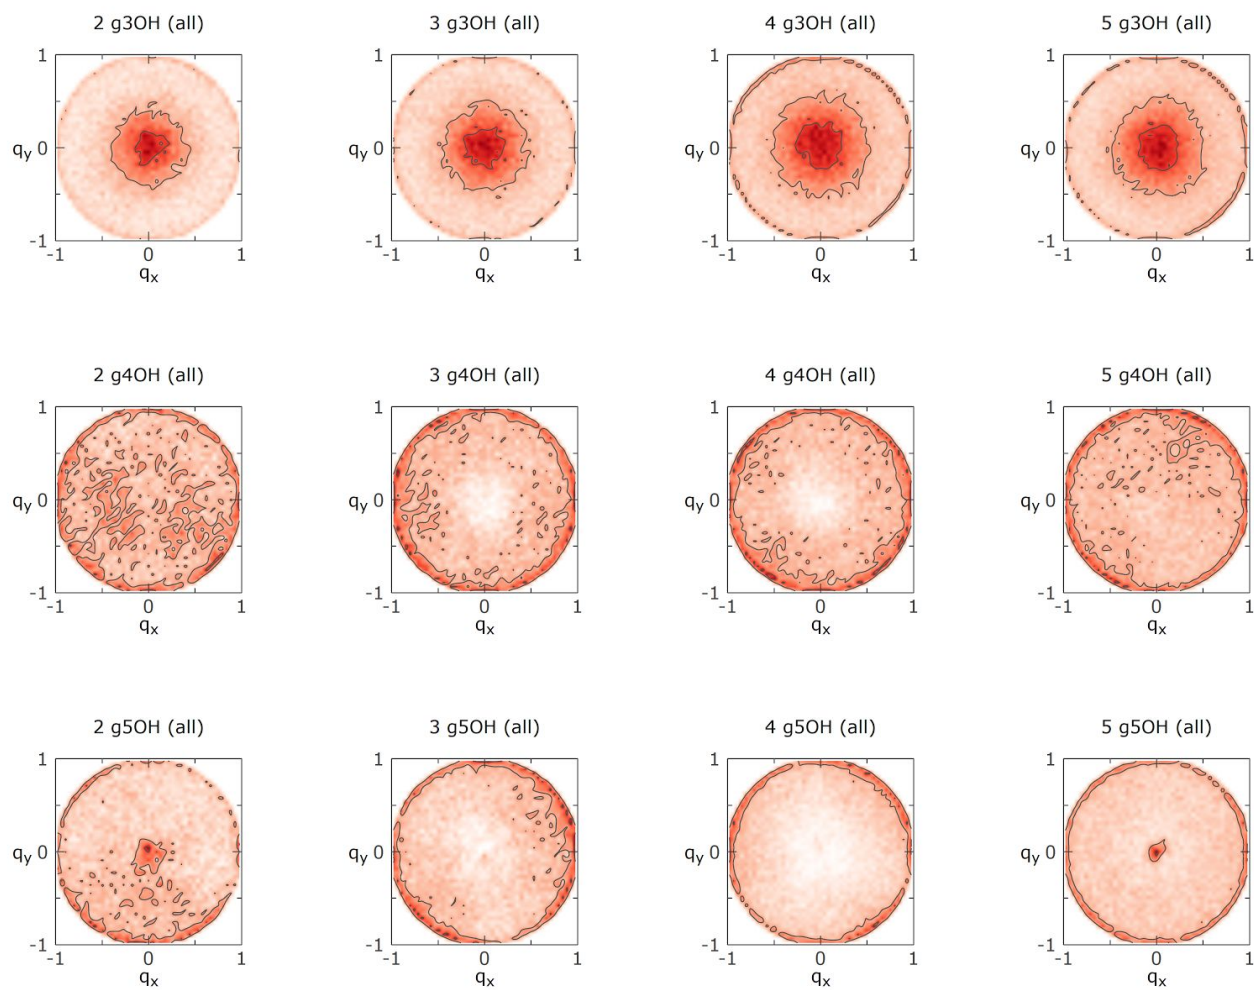

**Figure X4** Distribution of conformations of aggregated GQDs in water. These are the average of all the configuration during the simulations of all the
